# Supplementary material for: Protein adsorption by a high-capacity cation-exchange membrane prepared via surface-initiated atom transfer radical polymerization
Source: Royal Society of Chemistry journal article supplement (doi:10.1039/c5ra24678d), 2016-01-01
Supplement: c5ra24678d1.pdf [file c5ra24678d1.pdf]

**Protein adsorption by high-capacity cation-exchange membrane  
prepared via atom transfer radical polymerization**

Maofang He, Chaozhan Wang and Yinmao Wei\*

Key Laboratory of Synthetic and Natural Functional Molecule Chemistry of Ministry  
of Education, College of Chemistry and Materials Science, Northwest University,  
Xi'an 710069, China

\* Corresponding author: Yinmao Wei

Email: [ymwei@nwu.edu.cn](mailto:ymwei@nwu.edu.cn)

**Supporting materials**

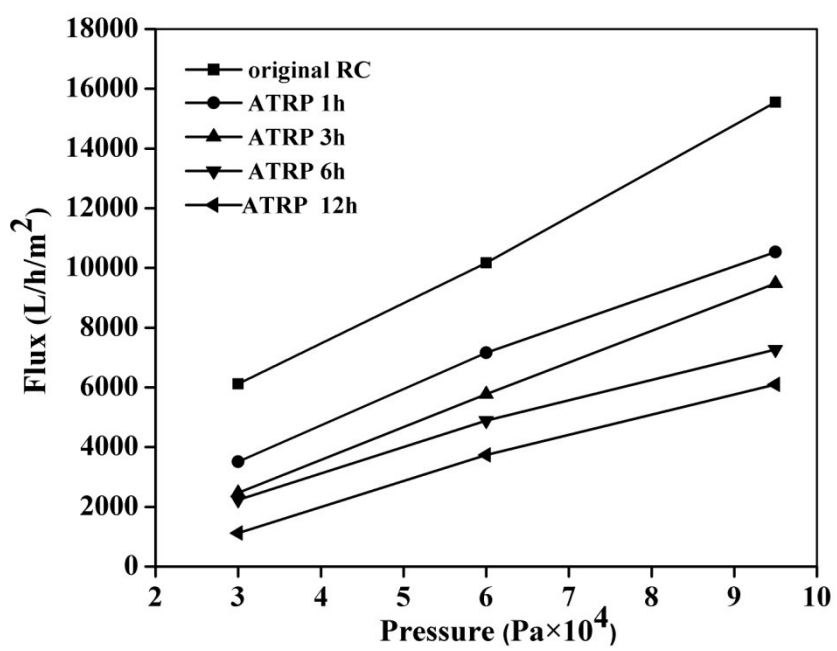

Fig.S1 Permeability of membrane with different graft time

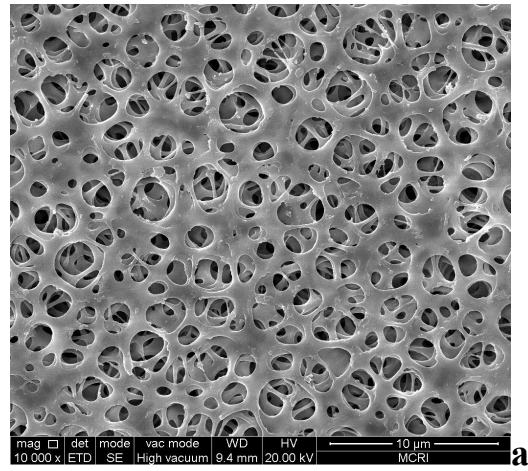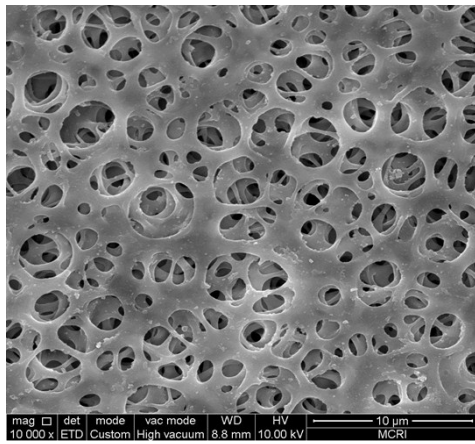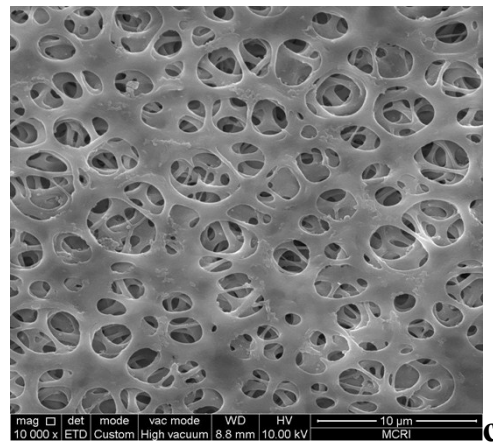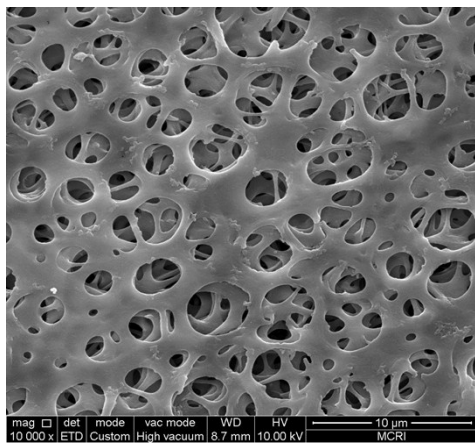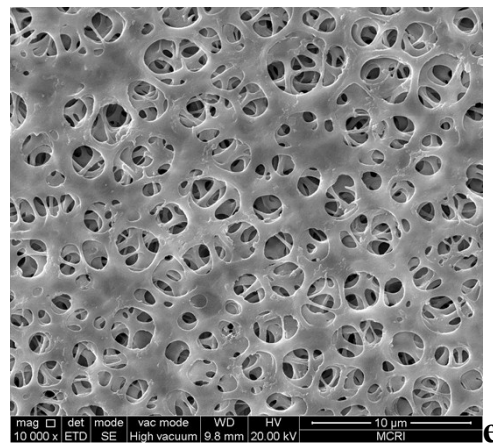

Fig.S2 SEM images of original RC membrane (a), b~e: RC/P-COOH membranes at ATRP time of 1 h (b), 3 h (c), 6 h (d), 12 h (e)

**Table S1 Fitted parameters for Langmuir equation from the adsorption isotherms**

| ATRP     |                              | Equation parameters            |                        |       |
|----------|------------------------------|--------------------------------|------------------------|-------|
| time (h) | $Q_m$ (mg mL <sup>-1</sup> ) | $K_L^a$ (mL mg <sup>-1</sup> ) | Linear equation        | $R^2$ |
| 1        | 23.3                         | 1.72                           | $C_e/Q=0.043C_e+0.025$ | 0.990 |
| 3        | 55.6                         | 1.64                           | $C_e/Q=0.018C_e+0.011$ | 0.988 |
| 6        | 100.0                        | 1.43                           | $C_e/Q=0.010C_e+0.007$ | 0.980 |
| 12       | 125.0                        | 1.33                           | $C_e/Q=0.008C_e+0.006$ | 0.981 |

a)  $K_L$  is the equilibrium constant
